# Supplementary material
Source: publisher figshare collection journal article supplement (https://frontiersin.figshare.com/ndownloader/files/12381410)
Supplement: Supplementary file 1 [file 12381410]

## Table 1 Supplemental Material. Primer information for regions amplified in the current study.

## 
